# Supplementary material for: Visualized Quantitative Evaluation of Gastrointestinal Activity in Healthy Volunteers Using a Noninvasive Single-Channel Electroamplifier
Source: Hindawi journal article supplement (doi:10.1155/2023/6902635), 2023-09-14
Supplement: f1 [file 6902635.f1.zip]

Archive with 2 entries (2 files):
- Appendix I-V.docx
- Appendix VI.xlsx
