# Supplementary material for: Visualized Quantitative Evaluation of Gastrointestinal Activity in Healthy Volunteers Using a Noninvasive Single-Channel Electroamplifier
Source: Hindawi journal article supplement (doi:10.1155/2023/6902635), 2023-09-14
Supplement: f1 [file 6902635.f1.zip › Appendix I-V.docx]

**Appendix**

**Appendix I. Preliminary Study: Appropriate electrode placement for electroenterography**

Objectives

Electrode placement affects the parameters for measurement, but the appropriate placement site for electroenterography (EEnG) is not yet known.23 The purpose of the preliminary study was to identify appropriate electrode placement for EEnG of the small intestine.

Methods

The participant criteria, procedures, record settings, EEnG data analysis, and statistics were the same as that in the main study; only the electrode placement differed from that in the main study.

Eight surface electrodes, a reference electrode, and a ground electrode were placed on the abdominal skin surface. Electrodes were applied at 5 cm intervals across the abdomen, as shown in Appendix II, to identify appropriate electrode placement over the small intestine. This arrangement created 10 channels, and we considered the channel showing a significant difference in small intestinal myoelectric activity between preprandial and postprandial periods to be appropriately placed. If there were no significant differences, any site was considered acceptable.

Results

Fourteen participants were recruited, and all were analyzed. The participants' background data were as follows: all males, median age 32 (28–36) years, height 171 (169–180) cm, weight 65 (61–70) kg, and body mass index 21.9 (21.2–22.6) kg/m2 (Appendix III).

There was no significant difference between preprandial and postprandial small intestinal dominant frequency in all 10 channels (Appendix IV). Similarly, there was no significant difference between preprandial and postprandial small intestinal dominant power in all channels (Appendix V).

Conclusion

No significant differences were found in any channel; therefore, any site was acceptable for EEnG. In the main study, we decided to use channel 2 for EEnG measurements.

**Appendix II. Electrode placement sites and channel settings in preliminary studies**


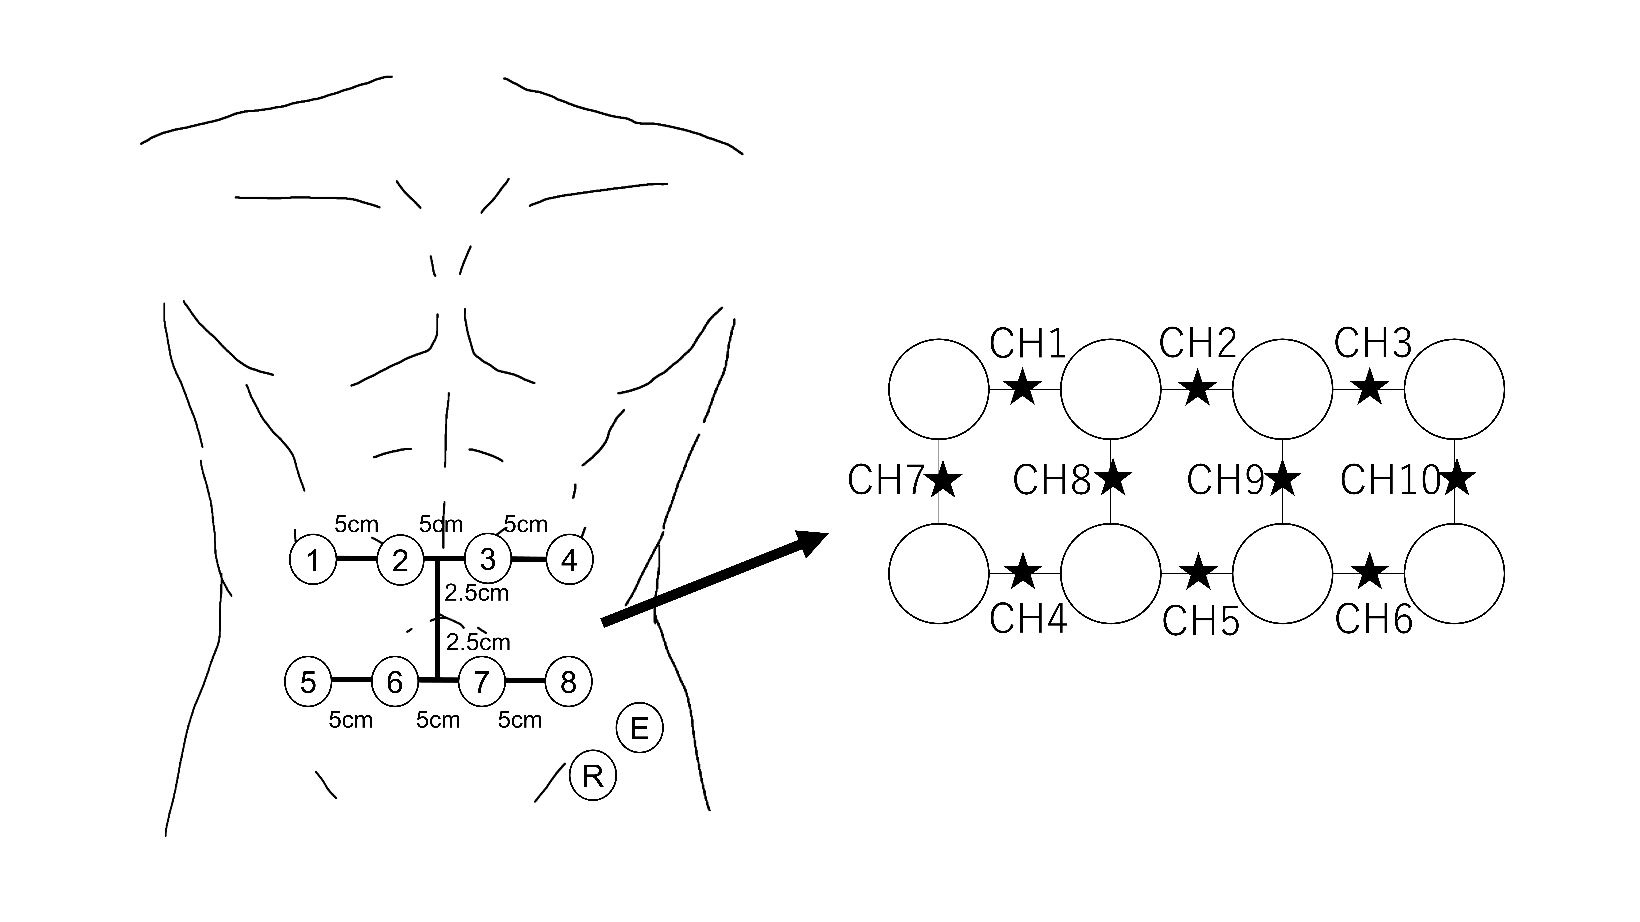


**Appendix III. Participants’ baseline data in the preliminary study**

| Variables | n=14 |
| --- | --- |
| Male sex, n (%) | 14 (100) |
| Age, years, median (IQR) | 32 (28–36) |
| Height, cm, median (IQR) | 171 (169–180) |
| Weight, kg, median (IQR) | 65 (61–70) |
| BMI, kg/m2, median (IQR) | 21.9 (21.2–22.6) |

BMI, body mass index; IQR, interquartile range

**Appendix IV. Dominant frequency of the small intestine in the preliminary study**

| CH | Preprandial | Postprandial | *p* value |
| --- | --- | --- | --- |
|  | Median (IQR) | Median (IQR) |  |
| 1 | 10.1 (9.9–10.5) | 10.0 (9.8–10.2) | 0.300 |
| 2 | 10.4 (10.1–10.5) | 10.2 (10.0–10.5) | 0.397 |
| 3 | 10.4 (10.2–10.6) | 10.5 (10.0–10.8) | 0.875 |
| 4 | 10.1 (9.8–10.3) | 10.1 (9.8–10.2) | 0.551 |
| 5 | 10.2 (9.9–10.4) | 10.1 (9.9–10.3) | 0.826 |
| 6 | 10.2 (10.0–10.4) | 10.2 (9.8–10.6) | 0.433 |
| 7 | 10.1 (9.8–10.3) | 10.0 (9.7–10.2) | 0.470 |
| 8 | 10.2 (9.9–10.4) | 10.1 (9.8–10.4) | 0.594 |
| 9 | 10.2 (10.0–10.4) | 10.1 (9.8–10.3) | 0.594 |
| 10 | 10.3 (10.1–10.5) | 10.3 (10.1–10.7) | 0.730 |

CH, channel; IQR, interquartile range

**Appendix V. Dominant power of the small intestine in the preliminary study**

| CH | Preprandial | Postprandial | *p* value | Power ratio |
| --- | --- | --- | --- | --- |
|  | Median (IQR) | Median (IQR) |  | Median (IQR) |
| 1 | 63.6 (33.5–121.0) | 71.9 (42.1–101.7) | 0.826 | 1.2 (0.5–1.9) |
| 2 | 38.5 (33.1–82.4) | 59.0 (39.4–96.0) | 0.594 | 1.1 (0.6–1.6) |
| 3 | 70.1 (52.2–123.4) | 73.3 (49.4–152.3) | 0.975 | 1.0 (0.7–1.4) |
| 4 | 48.3 (31.7–91.1) | 53.7 (41.1–106.4) | 0.363 | 0.9 (0.6–1.5) |
| 5 | 37.9 (25.9–72.1) | 48.8 (29.1–78.7) | 0.510 | 1.1 (0.6–2.0) |
| 6 | 59.8 (29.8–101.7) | 83.4 (32.1–119.8) | 0.875 | 1.0 (0.6–2.6) |
| 7 | 62.8 (33.3–132.7) | 53.0 (26.0–114.8) | 0.470 | 1.0 (0.2–2.6) |
| 8 | 42.2 (28.7–65.1) | 47.6 (30.8–65.4) | 0.778 | 1.0 (0.7–1.7) |
| 9 | 59.3 (33.1–92.5) | 48.1 (36.8–132.4) | 0.925 | 0.8 (0.6–1.6) |
| 10 | 55.1 (37.3–149.8) | 84.1 (36.4–144.4) | 0.510 | 1.2 (0.6–1.9) |

CH, channel; IQR, interquartile range
