# Supplementary material for: Visualized Quantitative Evaluation of Gastrointestinal Activity in Healthy Volunteers Using a Noninvasive Single-Channel Electroamplifier
Source: Hindawi journal article supplement (doi:10.1155/2023/6902635), 2023-09-14
Supplement: f1 [file 6902635.f1.zip › Appendix VI.xlsx]

## Sheet: data
no	male	age	height	weight	body_mass_index	last_meal	last_defecation	Bristol_Stool_From_Scale	gastro_fre_pre	gastro_pow_pre	entero_fre_pre	entero_pow_pre	bradygastria pre	normogastria pre	tachygastria pre	gastro_fre_post	gastro_pow_post	entero_fre_post	entero_pow_post	bradygastria post	normogastria post	tachygastria post	power_ratio_gastro	power_ratio_entero
1	1	30	182	67	20.227	4	20	4	3.08	758.428	11.2122	123.915	0	1	0	3.08	1951.03	10.7755	99.6966	0	1	0	2.57246	0.804559
2	1	27	170	56	19.3772	5	11	4	2.829	1546.6	10.7538	36.704	0	1	0	2.94462	2865.01	9.728	129.564	0	1	0	1.85246	3.52996
3	1	30	172	76	25.6896	7	12	5	3.07412	587.933	10.0733	47.7952	0	1	0	3.05294	516.619	10.1904	131.786	0	1	0	0.878703	2.7573
4	1	28	170	61	21.1073	6	10	4	3.08667	10974.3	9.69	105.71	0	1	0	3.12273	1097.54	9.6336	304.003	0	1	0	0.10001	2.87582
5	1	26	170	71	24.5675	10	21	4	2.96222	878.448	10.36	26.8795	0	1	0	3.0216	4130.2	9.60667	27.986	0	1	0	4.7017	1.04116
6	1	32	161	55	21.2183	5	22	4	3.30286	1072.05	10.8689	42.3798	0	1	0	3.41739	1488.88	10.3222	89.8759	0	1	0	1.38882	2.12072
7	1	32	171	64	21.8871	4	20	5	3.15	245.339	10.61	30.1914	0	1	0	3.09789	2195.94	10.0547	81.3576	0	1	0	8.95063	2.69473
8	1	34	172	60	20.2812	14	16	4	3.01	838.193	10.326	36.5158	0	1	0	3.036	1824.09	10.0089	101.096	0	1	0	2.17622	2.76854
9	1	51	168	64	22.6757	14	3	5	2.576	72.4613	10.1933	28.358	0	1	0	2.63429	460.112	9.61714	72.6935	0	1	0	6.34976	2.56342
10	1	25	180	76	23.4568	4	20	4	3.18	440.542	10.1686	89.2305	0	1	0	3.52091	770.671	11.0123	105.814	0	1	0	1.74937	1.18586
11	1	52	174	68	22.46	6	4	4	3.07059	219.323	10.9467	62.05	0	1	0	3.144	484.808	10.9615	64.1607	0	1	0	2.21048	1.03402
12	1	35	182	70	21.1327	4	4	4	3.11556	663.622	11.3133	31.7532	0	1	0	3.22364	1474.49	10.2812	59.5076	0	1	0	2.22189	1.87407
13	1	38	183	80	23.8884	6	6	4	2.98667	695.137	10.2576	59.6664	0	1	0	3.02	504.87	10.056	33.892	0	1	0	0.726288	0.568025
14	1	35	168	61	21.6128	4	10	4	3.24	1968.19	11.0937	17.4021	0	1	0	2.82261	4619.8	11.15	22.1127	0	1	0	2.34723	1.27069
15	0	25	158	40	16.0231	15	15	4	3.29778	1838.67	9.76667	93.6121	0	1	0	3.15	2052.85	10.4908	139.206	0	1	0	1.11649	1.48706
16	0	34	157	52	21.0962	4.5	3	3	3.3225	535.055	10.4337	61.5143	0	1	0	3.32444	1308.17	10.2644	67.0136	0	1	0	2.44492	1.0894
17	1	31	173	51	17.0403	5	8	4	2.95091	3011.65	11.2656	57.0291	0	1	0	3.19091	2671.63	10.4289	82.1877	0	1	0	0.887098	1.44115
18	1	25	169	71	24.8591	11	11	4	3.04889	384.32	10.3356	21.1419	0	1	0	3.10889	1133.71	10.308	23.0208	0	1	0	2.94991	1.08887
19	0	57	148	59	26.9357	3.5	8.5	4	3.08455	303.606	10.4675	49.6103	0	1	0	3.32842	376.631	10.2089	38.015	0	1	0	1.24052	0.766272
20	0	41	158	44	17.6254	4.5	72	4	3.23556	9335.4	10.5511	136.966	0	1	0	3.12889	47752.7	9.66	1410.6	0	1	0	5.11522	10.2989
21	0	46	158	62	24.8358	4	20	4	2.9975	175.514	9.94	30.8707	0	1	0	3.2775	189.853	9.5064	28.694	0	1	0	1.0817	0.92949
22	0	48	156	50	20.5457	4	24	5	2.5224	742.342	10.4644	25.5538	0	1	0	2.84889	1510.3	11.1288	31.207	0	1	0	2.0345	1.22123
23	0	39	157	53	21.5019	5	2	1	3.10444	5045.9	10.1088	40.4593	0	1	0	3.17333	1039.52	10.5867	41.7589	0	1	0	0.206013	1.03212
24	1	35	166	60	21.7738	12	24	4	2.54625	543.078	9.2304	83.6244	0	1	0	2.8575	1706.48	9.22846	83.206	0	1	0	3.14224	0.994996
25	1	23	184	80	23.6295	6	24	4	2.89556	1024.91	9.31125	69.8196	0	1	0	2.78	1250.2	9.185	51.7896	0	1	0	1.21982	0.741763
26	0	36	159	52	20.5688	6	10	5	2.90824	7112.99	10.4625	70.7751	0	1	0	3.1248	1936.8	9.744	123.401	0	1	0	0.27229	1.74357
27	0	35	165	75	27.5482	15	20	5	2.85	467.033	9.94889	4.7126	0	1	0	1.89429	723.775	9.84	11.7281	1	0	0	1.54973	2.48867
28	0	34	160	48	18.75	15	2	4	3.04444	9560.99	11.2733	75.6178	0	1	0	3.17333	13938.1	10.6775	136.538	0	1	0	1.45781	1.80564
29	0	43	165	48	17.6309	5	3	2	2.416	3776.38	10.3774	251.18	0	1	0	2.82	4214.06	11.4	299.411	0	1	0	1.1159	1.19202
30	0	53	160	46	17.9688	6	6	4	2.98	1978.13	10.6282	25.6321	0	1	0	1.255	346.76	10.0696	43.5256	1	0	0	0.175297	1.69809
31	0	30	158	51	20.4294	4	3	4	3.16667	523.716	11.1044	16.2051	0	1	0	3.12	27689.3	10.4443	35.417	0	1	0	52.8708	2.18554
32	0	61	157	58	23.5304	5	5	1	3.06	698.262	11.716	49.1009	0	1	0	2.95667	769.716	9.61091	13.3943	0	1	0	1.10233	0.272791
33	0	27	165	50	18.3655	12	20	3	2.34	343.548	10.44	286.436	0	1	0	2.71111	1021.54	10.8711	54.6083	0	1	0	2.9735	0.190648
34	1	37	172	67	22.6474	7	2	4	2.78667	1168.44	10.0133	16.6831	0	1	0	2.94667	8722.27	10.056	64.6336	0	1	0	7.46491	3.87418
35	0	49	156	70	28.764	12	18	4	2.96889	376.967	10.2632	19.9908	0	1	0	0.953333	829.272	12.2533	38.6359	1	0	0	2.19985	1.93269
36	0	53	154	51	21.5045	15	30	4	3.02	3971.93	9.39	130.565	0	1	0	1.36909	622.694	10.8644	226.272	1	0	0	0.156773	1.73302
37	0	45	161	54	20.8325	5	5	3	1.51846	8370.2	9.55895	36.7919	1	0	0	1.0525	1541.69	10.24	78.8472	1	0	0	0.184188	2.14306
38	0	33	165	57	20.9366	14	22	5	2.96667	1157.12	10.959	60.9016	0	1	0	3.32538	10728.8	10.6062	153.826	0	1	0	9.272	2.52581
39	1	28	178	70.5	22.251	13	16	5	2.50222	2071.24	10.1191	36.6672	0	1	0	2.55789	2805.95	9.76	89.2434	0	1	0	1.35472	2.43387
40	1	33	178	80	25.2493	4	12	4	2.922	93.3802	10.5044	20.4458	0	1	0	2.66455	198.75	9.85778	28.2417	0	1	0	2.12839	1.3813
41	1	45	175	67	21.8776	10	14	4	2.71043	370.432	10.3546	24.2334	0	1	0	3.15333	3785.88	10.1925	29.625	0	1	0	10.2202	1.22249
42	1	26	174	66	21.7994	20	5	4	2.99556	614.616	10.2382	157.268	0	1	0	2.82286	1053.46	10.06	51.1456	0	1	0	1.71401	0.325212
43	1	29	174	65	21.4692	5	24	5	2.78222	4311.19	10.0774	87.2648	0	1	0	2.76	2319.18	10.7875	502.078	0	1	0	0.537945	5.7535
44	1	25	169	68	23.8087	4	7	4	3.07333	659.146	10.4123	11.2892	0	1	0	1.845	327.402	9.94	40.1522	1	0	0	0.496707	3.55669
45	0	24	161	50	19.2894	7	4	4	2.72444	5677.86	11.2	150.996	0	1	0	2.34	2289.76	11.3238	174.563	0	1	0	0.403279	1.15607
46	0	25	160	58	22.6562	5	32	4	3.05217	270.325	10.62	52.522	0	1	0	2.81727	349.839	10.3385	68.1917	0	1	0	1.29414	1.29834
47	0	39	167	49	17.5697	5	9	4	2.93111	1890.32	8.80615	649.755	0	1	0	3.09333	3235.86	9.948	362.142	0	1	0	1.7118	0.557351
48	0	24	158	52	20.83	5	11	4	2.70429	5546.43	10.4322	23.2805	0	1	0	2.95862	4722.67	9.939	31.9866	0	1	0	0.851478	1.37396
49	0	26	148	48	21.9138	5	5	3	2.83333	7853.54	10.2424	64.9936	0	1	0	3.05333	10967	9.25846	136.407	0	1	0	1.39644	2.09877
50	0	31	158	46	18.4265	5	24	4	3.03333	818.627	10.5044	56.2846	0	1	0	3.17111	1803.35	10.1844	54.3738	0	1	0	2.20289	0.966051
